# Supplementary material for: Superior cycling and rate performances of rattle-type CoMoO4 microspheres prepared by one-pot spray pyrolysis
Source: Royal Society of Chemistry journal article supplement (doi:10.1039/c4ra01278j), 2014-01-01
Supplement: c4ra01278j1.pdf [file c4ra01278j1.pdf]

## Supporting Information

### **Superior cycling and rate performances of rattle-type CoMoO<sub>4</sub> microspheres prepared by one-pot spray pyrolysis**

You Na Ko,<sup>ab</sup> Yun Chan Kang<sup>\*a</sup> and Seung Bin Park<sup>b</sup>

<sup>a</sup>Department of Chemical Engineering, Konkuk University, 1 Hwayang-dong, Gwangjin-gu, Seoul 143-701, Korea

<sup>b</sup>Department of Chemical and Biomolecular Engineering, Korea Advanced Institute of Science and Technology, 291 Daehak-ro, Yuseong-gu, Daejeon 305-701, Korea

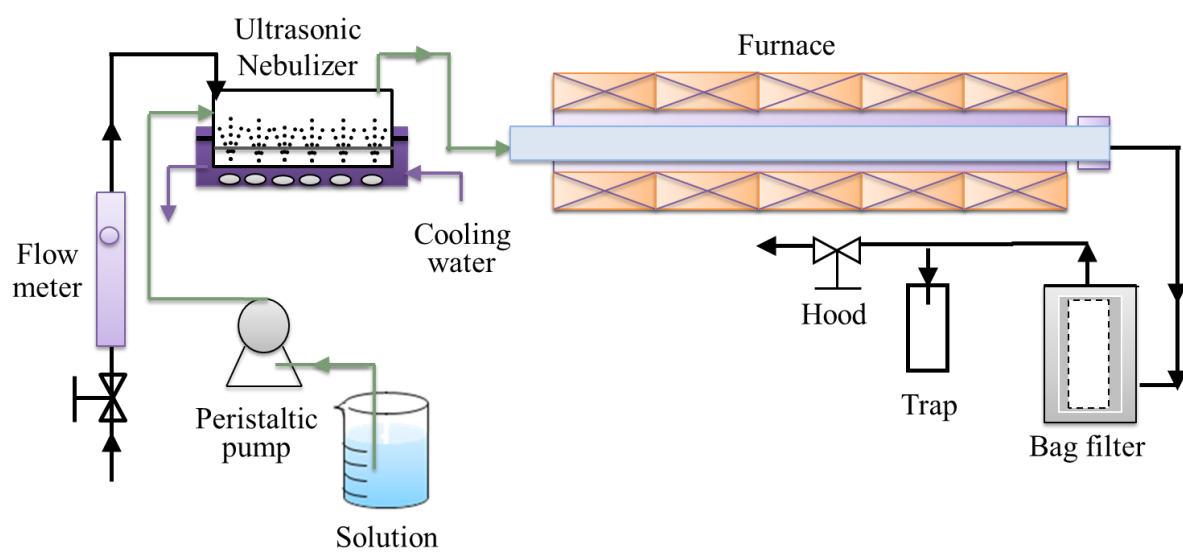

**Fig. S1** Schematic diagram of the ultrasonic spray pyrolysis system.

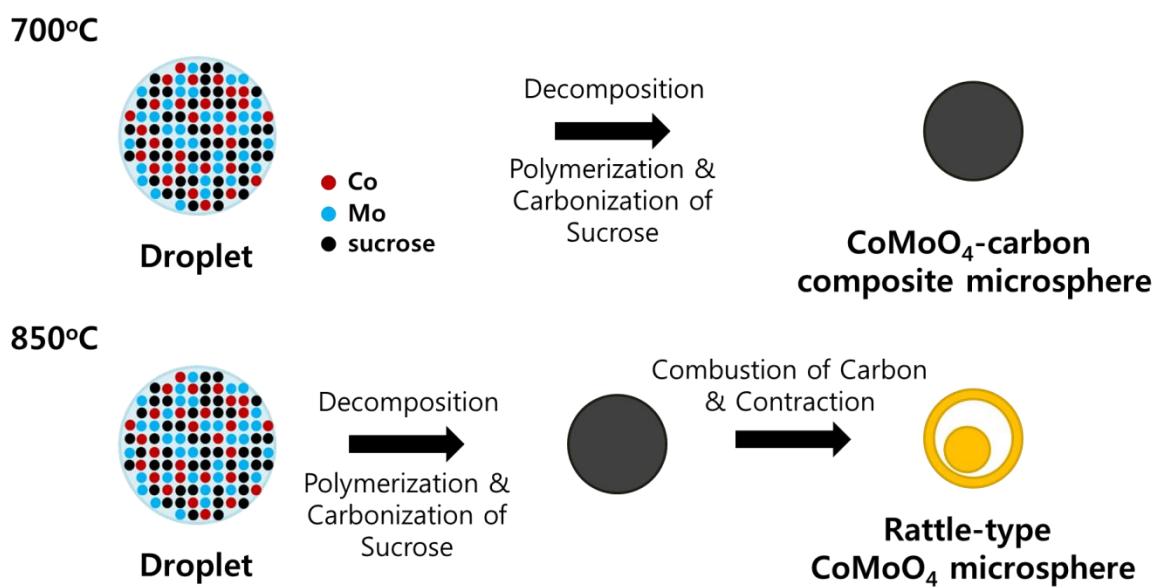

**Fig. S2** Formation mechanisms of CoMoO<sub>4</sub>-carbon composite microsphere and rattle-type CoMoO<sub>4</sub> microsphere in the spray pyrolysis process.

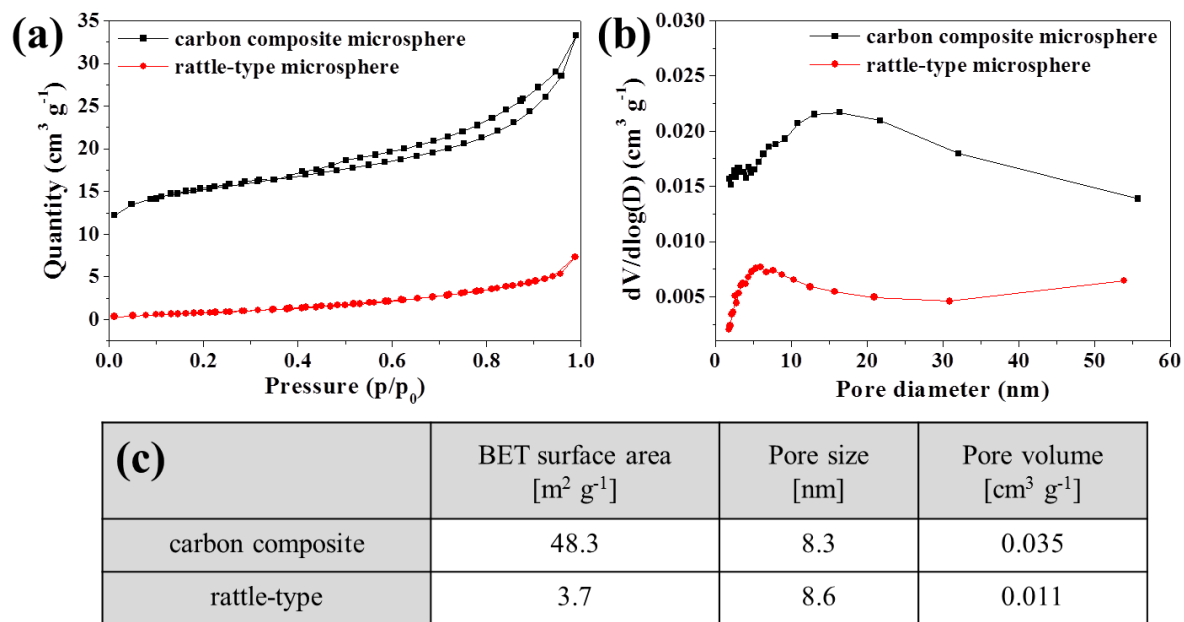

**Fig. S3** (a) Nitrogen adsorption-desorption isotherms, (b) pore size distribution curves, and (c) textural properties of rattle-type CoMoO<sub>4</sub> microspheres and CoMoO<sub>4</sub>-carbon composite microspheres.

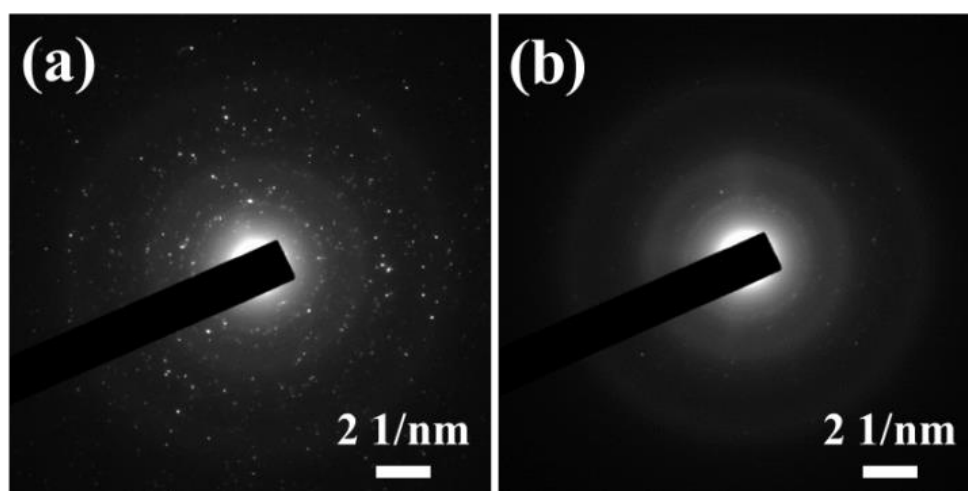

**Fig. S4** SAED patterns of (a) rattle-type  $\text{CoMoO}_4$  and (b)  $\text{CoMoO}_4$ -carbon composite microspheres.

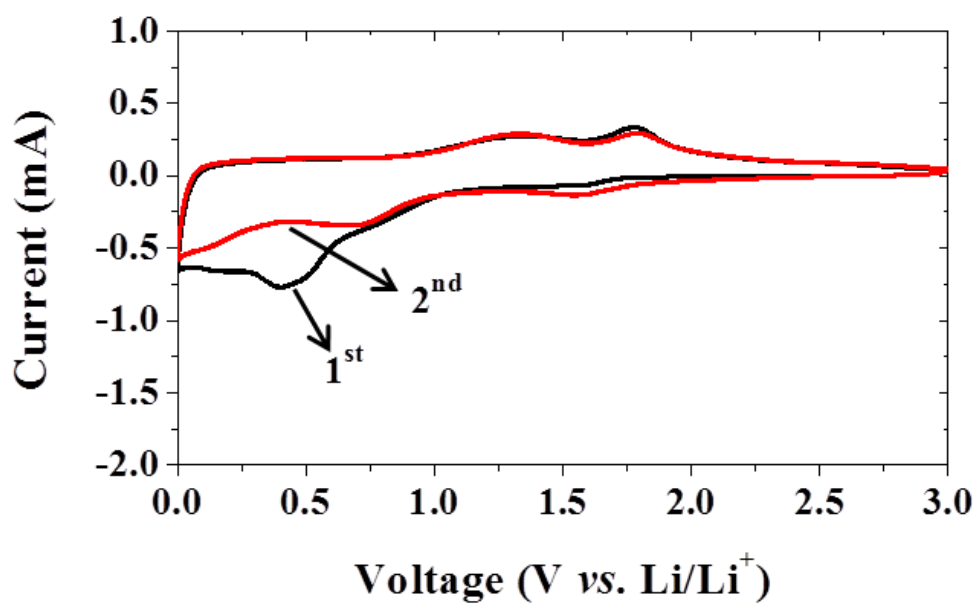

**Fig. S5** CVs of CoMoO<sub>4</sub>-carbon composite microspheres for the first and second cycles.

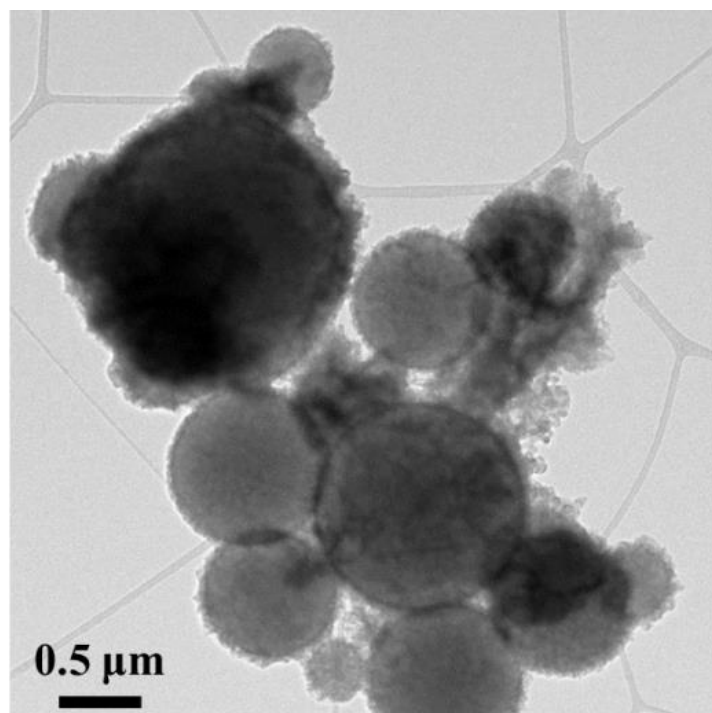

**Fig. S6** TEM image of  $\text{CoMoO}_4$ -carbon composite microspheres after cycling.
